# Supplementary material for: Paraoxonase/Arylesterase Activity of Serum Paraoxonase-1 and Schizophrenia: A Systematic Review and Meta-Analysis
Source: MDPI journal article supplement (doi:10.3390/antiox12081484), 2023-07-25
Supplement: s1 [file s1]

**Supplementary Table 3.** The Joanna Briggs Institute critical appraisal checklist.

[illegible]
